# Supplementary material
Source: PubMed Central journal article supplement (PMC11108566)
Supplement: 18_2016_2309_MOESM1_ESM.pdf [file 18_2016_2309_MOESM1_ESM.pdf]

## Supplementary Information

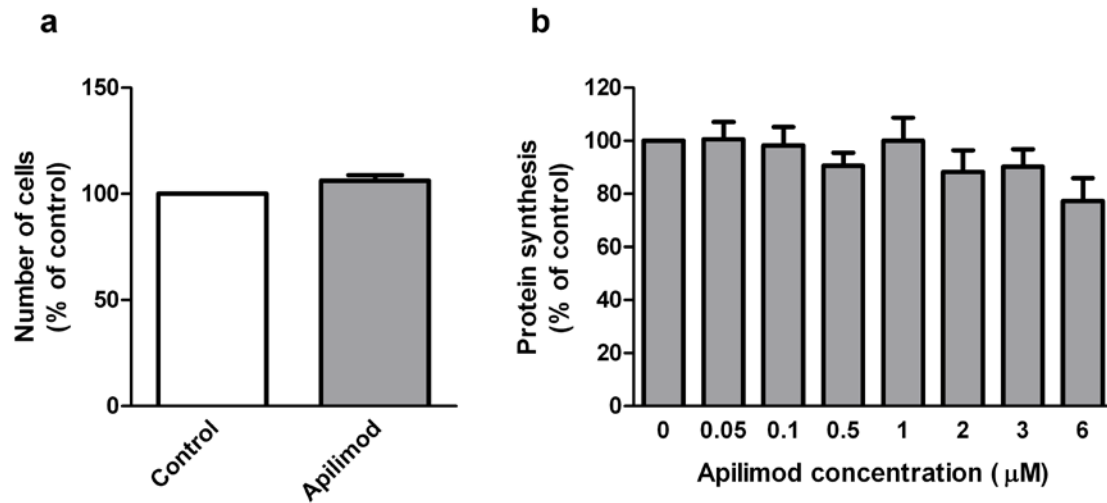

**Supplementary Fig. 1** Apilimod treatment is well tolerated by PC-3 cells. **a** PC-3 cells were treated for 21 h with apilimod (0.5  $\mu\text{M}$ ) or control (0.1% DMSO) before the number of cells was counted. **b** PC-3 cells were treated for 21 h with different concentrations of apilimod before incorporation of [ $^3\text{H}$ ]leucine into newly synthesized proteins was measured. The results are expressed as percentage of control and plotted as mean values + standard error of the mean, n=3

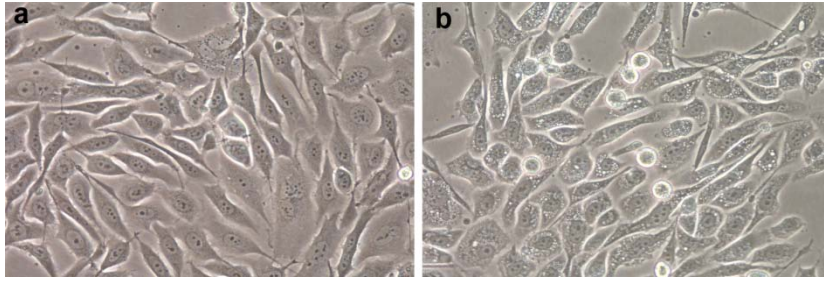

**Supplementary Fig. 2** Induction of vacuoles, a phenotypic hallmark of PIKfyve inhibition was observed by light microscopy in PC-3 cells after PIKfyve inhibition. **a** Control cells and **b** cells treated with apilimod (0.5  $\mu$ M).

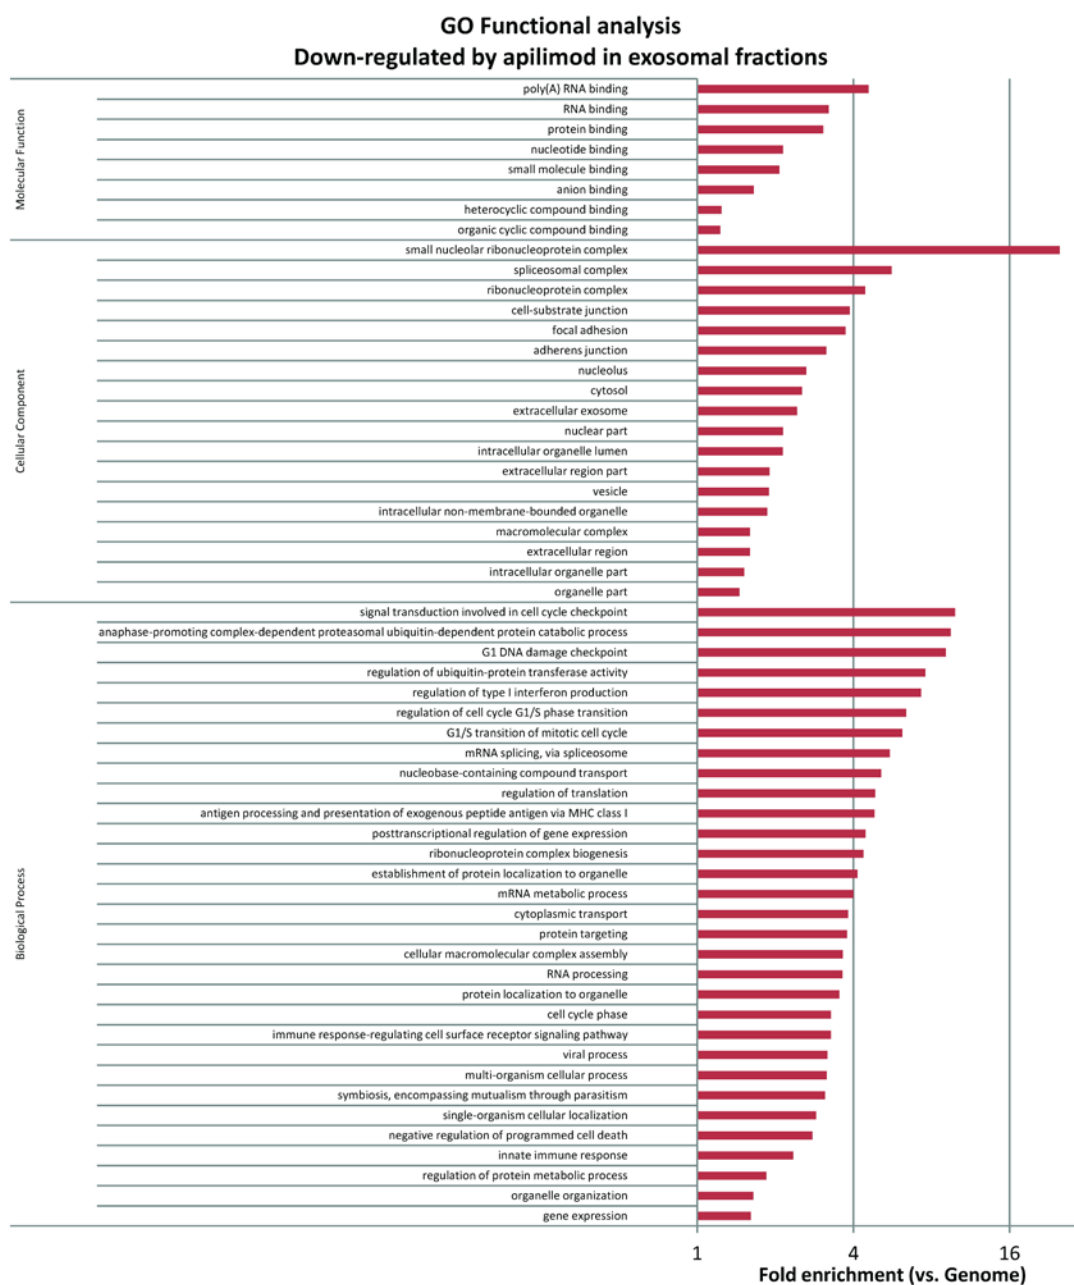

**Supplementary Fig. 3** Pathways down-regulated in exosomal fractions after apilimod treatment.

Functional analysis was performed on proteins in exosomal fractions that were significantly changed by apilimod. Analysis performed with DAVID-algorithm

(<http://david.abcc.ncifcrf.gov/>) and fold-enrichment of GO-entries compared to genome

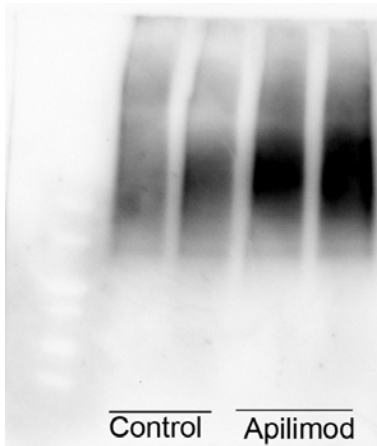

**Supplementary Fig. 4** Ubiquitin is increased in exosomal fractions after apilimod treatment. Representative immunoblot showing ubiquitin in exosome preparations after apilimod and control treatment

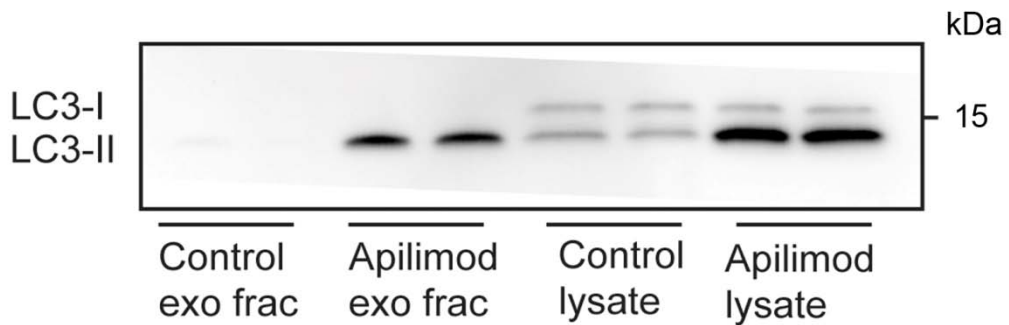

**Supplementary Fig. 5** Only the lipidated form of LC3 (LC3-II) is found in exosomal fractions. Representative immunoblot showing LC3 in exosomal fractions (exo frac) and lysates after apilimod and control treatment

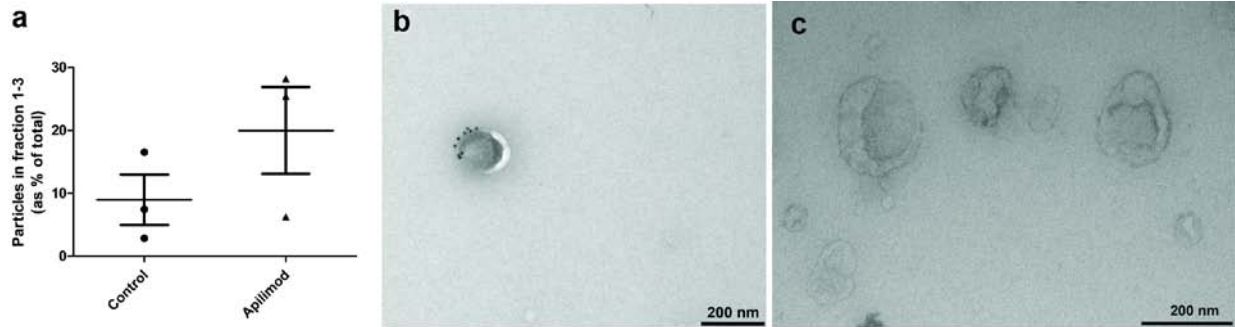

**Supplementary Fig. 6** Analysis of density gradient fractions by NTA and EM.

Exosomes were separated from p62-positive structures by OptiPrep density gradient (5-30%) centrifugation at 100,000 g for 18 h. **a** The fractions positive for p62, LC3-II and NBR1 (fraction 1-3) were combined and the fractions positive for caveolin-1, Tsg101 and Alix (fraction 4-9) were combined, before they were analyzed by NTA. **b** Immuno-EM on fraction 1-3 after apilimod treatment, labeled with p62. **c** Immuno-EM on fraction 4-9 after apilimod treatment, labeled with p62.

|                                                                  | Gene name | Uniprot Accession Number | T-test; api exo frac vs ctr exo frac | Ratio api exo frac vs ctr exo frac |
|------------------------------------------------------------------|-----------|--------------------------|--------------------------------------|------------------------------------|
| Thymidine phosphorylase                                          | TYMP      | P19971                   | 0.00                                 | inf                                |
| Ferrochelatase, mitochondrial                                    | FECH      | P22830                   | 0.00                                 | inf                                |
| Cyclin-dependent kinase 2                                        | CDK2      | P24941                   | 0.01                                 | inf                                |
| Seizure 6-like protein 2                                         | SEZ6L2    | Q6UXD5                   | 0.01                                 | inf                                |
| E3 ubiquitin-protein ligase RNF13                                | RNF13     | O43567                   | 0.02                                 | inf                                |
| WD repeat domain phosphoinositide-interacting protein 2          | WIPI2     | Q9Y4P8                   | 0.05                                 | inf                                |
| Sphingosine 1-phosphate receptor 2                               | S1PR2     | O95136                   | 0.02                                 | 68.91                              |
| Neurolysin, mitochondrial                                        | NLN       | Q9BYT8                   | 0.01                                 | 62.30                              |
| Optineurin                                                       | OPTN      | Q96CV9                   | 0.19                                 | 43.58                              |
| Integrin beta-1-binding protein 1                                | ITGB1BP1  | O14713                   | 0.04                                 | 9.15                               |
| Endothelial cell-selective adhesion molecule                     | ESAM      | Q96AP7                   | 0.02                                 | 8.21                               |
| Histamine H1 receptor                                            | HRH1      | P35367                   | 0.02                                 | 7.20                               |
| Probable G-protein coupled receptor 37                           | GPR37     | O15354                   | 0.03                                 | 4.81                               |
| CD82 antigen                                                     | CD82      | P27701                   | 0.03                                 | 4.52                               |
| Microtubule-associated proteins 1A/1B light chain 3B             | MAP1LC3B  | Q9GZQ8                   | 0.01                                 | 4.31                               |
| Sequestosome-1                                                   | SQSTM1    | Q13501                   | 0.13                                 | 3.62                               |
| Ferritin light chain                                             | FTL       | P02792                   | 0.04                                 | 3.58                               |
| Next to BRCA1 gene 1 protein                                     | NBR1      | Q14596                   | 0.20                                 | 3.49                               |
| Tetraspanin-8                                                    | TSPAN8    | P19075                   | 0.00                                 | 3.39                               |
| Calcium-binding and coiled-coil domain-containing protein 2      | CALCOCO2  | Q13137                   | 0.16                                 | 3.19                               |
| Brain protein I3                                                 | BRI3      | O95415                   | 0.02                                 | 3.04                               |
| Protein spinster homolog 1                                       | SPNS1     | Q9H2V7                   | 0.01                                 | 2.99                               |
| Dystrobrevin alpha                                               | DTNA      | Q9Y4J8                   | 0.03                                 | 2.84                               |
| Solute carrier family 52, riboflavin transporter, member 2       | SLC52A2   | Q9HAB3                   | 0.02                                 | 2.74                               |
| Secretory carrier-associated membrane protein 2                  | SCAMP2    | O15127                   | 0.02                                 | 2.68                               |
| Gamma-aminobutyric acid receptor-associated protein-like 2       | GABARAPL2 | P60520                   | 0.09                                 | 2.62                               |
| Large neutral amino acids transporter small subunit 3            | SLC43A1   | O75387                   | 0.02                                 | 2.54                               |
| Ragulator complex protein LAMTOR1                                | LAMTOR1   | Q6IAA8                   | 0.01                                 | 2.49                               |
| Guanine nucleotide-binding protein G(I)/G(S)/G(T) subunit beta-1 | GNB1      | P62873                   | 0.02                                 | 2.48                               |
| Disintegrin and metalloproteinase domain-containing protein 10   | ADAM10    | O14672                   | 0.04                                 | 2.41                               |
| Guanine nucleotide-binding protein subunit beta-4                | GNB4      | Q9HAV0                   | 0.04                                 | 2.41                               |
| Phosphatase and actin regulator 4                                | PHACTR4   | Q8IZ21                   | 0.05                                 | 2.26                               |
| Guanine nucleotide-binding protein G(I)/G(S)/G(T) subunit beta-2 | GNB2      | P62879                   | 0.02                                 | 2.21                               |
| Actin, alpha cardiac muscle 1                                    | ACTC1     | P68032                   | 0.03                                 | 2.19                               |
| Myeloid-associated differentiation marker                        | MYADM     | Q96S97                   | 0.04                                 | 2.10                               |

|                                                                   |          |        |      |      |
|-------------------------------------------------------------------|----------|--------|------|------|
| 1-phosphatidylinositol 4,5-bisphosphate phosphodiesterase gamma-1 | PLCG1    | P19174 | 0.01 | 2.08 |
| Somatostatin receptor type 5                                      | SSTR5    | P35346 | 0.04 | 2.04 |
| L-lactate dehydrogenase A chain                                   | LDHA     | P00338 | 0.03 | 2.02 |
| Solute carrier family 2, facilitated glucose transporter member 1 | SLC2A1   | P11166 | 0.03 | 2.01 |
| GTPase KRas                                                       | KRAS     | P01116 | 0.02 | 1.99 |
| Vesicle-associated membrane protein 3                             | VAMP3    | Q15836 | 0.05 | 1.94 |
| MOB kinase activator 1B                                           | MOB1B    | Q7L9L4 | 0.03 | 1.93 |
| Tyrosine-protein kinase JAK1                                      | JAK1     | P23458 | 0.02 | 1.86 |
| Antithrombin-III                                                  | SERPINC1 | P01008 | 0.04 | 1.81 |
| Roundabout homolog 1                                              | ROBO1    | Q9Y6N7 | 0.03 | 1.80 |
| Tyrosine-protein phosphatase non-receptor type substrate 1        | SIRPA    | P78324 | 0.03 | 1.72 |
| E3 ubiquitin-protein ligase RNF167                                | RNF167   | Q9H6Y7 | 0.00 | 1.66 |
| Acid sphingomyelinase-like phosphodiesterase 3b                   | SMPDL3B  | Q92485 | 0.01 | 1.64 |
| Toll-interacting protein                                          | TOLLIP   | Q9H0E2 | 0.01 | 1.63 |
| Integrin alpha-1                                                  | ITGA1    | P56199 | 0.02 | 1.63 |
| Serine incorporator 3                                             | SERINC3  | Q13530 | 0.03 | 1.60 |
| Peripheral plasma membrane protein CASK                           | CASK     | O14936 | 0.03 | 1.59 |
| GTPase HRas                                                       | HRAS     | P01112 | 0.01 | 1.57 |
| Retinoic acid-induced protein 3                                   | GPRC5A   | Q8NFJ5 | 0.01 | 1.54 |
| Neuroplastin                                                      | NPTN     | Q9Y639 | 0.01 | 1.53 |
| DnaJ homolog subfamily A member 1                                 | DNAJA1   | P31689 | 0.01 | 1.52 |
| Ferritin heavy chain                                              | FTH1     | P02794 | 0.04 | 1.49 |
| Syntaxin-binding protein 3                                        | STXBP3   | O00186 | 0.02 | 1.48 |
| Band 4.1-like protein 3                                           | EPB41L3  | Q9Y2J2 | 0.05 | 1.47 |
| Solute carrier organic anion transporter family member 4A1        | SLCO4A1  | Q96BD0 | 0.02 | 1.46 |
| Anion exchange protein 2                                          | SLC4A2   | P04920 | 0.02 | 1.45 |
| Equilibrative nucleoside transporter 1                            | SLC29A1  | Q99808 | 0.03 | 1.43 |
| Pannexin-1                                                        | PANX1    | Q96RD7 | 0.01 | 1.42 |
| Protein numb homolog                                              | NUMB     | P49757 | 0.02 | 1.41 |
| Lysosomal-associated transmembrane protein 4A                     | LAPTM4A  | Q15012 | 0.05 | 1.41 |
| Cytochrome c                                                      | CYCS     | P99999 | 0.03 | 1.40 |
| Casein kinase I isoform gamma-3                                   | CSNK1G3  | Q9Y6M4 | 0.05 | 1.39 |
| Lysosome membrane protein 2                                       | SCARB2   | Q14108 | 0.02 | 1.27 |
| Proteasome subunit alpha type-6                                   | PSMA6    | P60900 | 0.01 | 1.23 |
| Guanine nucleotide-binding protein G(i) subunit alpha-2           | GNAI2    | P04899 | 0.05 | 1.23 |
| Na(+)/H(+) exchange regulatory cofactor NHE-RF1                   | SLC9A3R1 | O14745 | 0.01 | 1.22 |
| Vacuolar protein sorting-associated protein 28 homolog            | VPS28    | Q9UK41 | 0.00 | 1.16 |

**Supplementary Table 1** Significantly up-regulated proteins in exosomal fractions after apilimod treatment. Ratio api exo frac vs ctr exo frac; calculated as average TOP3TIC for exosomal fraction (exo frac) after apilimod (api) divided by average TOP3TIC for exosomal fraction after

control (ctr) treatment. inf; infinite ratio (not found in control exosomal fractions). All protein reference data are from [www.uniprot.org](http://www.uniprot.org)



|                                                                                               | Gene Name | Uniprot Accession Number | T-test; api exo frac vs ctr exo frac | Ratio api exo frac vs ctr exo frac |
|-----------------------------------------------------------------------------------------------|-----------|--------------------------|--------------------------------------|------------------------------------|
| 28S ribosomal protein S34, mitochondrial                                                      | MRPS34    | P82930                   | <b>0.000</b>                         | 0.00                               |
| SWI/SNF-related matrix-associated actin-dependent regulator of chromatin subfamily A member 5 | SMARCA5   | O60264                   | <b>0.000</b>                         | 0.00                               |
| Serine/arginine-rich splicing factor 5                                                        | SRSF5     | Q13243                   | <b>0.000</b>                         | 0.00                               |
| Protein FAM195A                                                                               | FAM195A   | Q9BUT9                   | <b>0.001</b>                         | 0.00                               |
| Ribose-5-phosphate isomerase                                                                  | RPIA      | P49247                   | <b>0.001</b>                         | 0.00                               |
| Epsin-2                                                                                       | EPN2      | O95208                   | <b>0.002</b>                         | 0.00                               |
| Nuclear pore complex protein Nup98-Nup96                                                      | NUP98     | P52948                   | <b>0.003</b>                         | 0.00                               |
| WD repeat-containing protein 92                                                               | WDR92     | Q96MX6                   | <b>0.003</b>                         | 0.00                               |
| ATP synthase subunit gamma, mitochondrial                                                     | ATP5C1    | P36542                   | <b>0.003</b>                         | 0.00                               |
| Vacuolar protein-sorting-associated protein 36                                                | VPS36     | Q86VN1                   | <b>0.003</b>                         | 0.00                               |
| Survival motor neuron protein                                                                 | SMN1      | Q16637                   | <b>0.005</b>                         | 0.00                               |
| Golgin subfamily A member 3                                                                   | GOLGA3    | Q08378                   | <b>0.005</b>                         | 0.00                               |
| E3 ubiquitin-protein ligase synoviolin                                                        | SYVN1     | Q86TM6                   | <b>0.006</b>                         | 0.00                               |
| Ankyrin repeat domain-containing protein 40                                                   | ANKRD40   | Q6A112                   | <b>0.009</b>                         | 0.00                               |
| Beta-arrestin-2                                                                               | ARRB2     | P32121                   | <b>0.009</b>                         | 0.00                               |
| Mitochondrial import inner membrane translocase subunit Tim8 B                                | TIMM8B    | Q9Y5J9                   | <b>0.010</b>                         | 0.00                               |
| Heat shock protein 75 kDa, mitochondrial                                                      | TRAP1     | Q12931                   | <b>0.011</b>                         | 0.00                               |
| Condensin complex subunit 1                                                                   | NCAPD2    | Q15021                   | <b>0.011</b>                         | 0.00                               |
| Caspase-2                                                                                     | CASP2     | P42575                   | <b>0.012</b>                         | 0.00                               |
| Cytoplasmic dynein 1 light intermediate chain 2                                               | DYNC1LI2  | O43237                   | <b>0.013</b>                         | 0.00                               |
| Mitochondrial import inner membrane translocase subunit Tim10                                 | TIMM10    | P62072                   | <b>0.015</b>                         | 0.00                               |
| PHD finger-like domain-containing protein 5A                                                  | PHF5A     | Q7RTV0                   | <b>0.016</b>                         | 0.00                               |
| TBC1 domain family member 23                                                                  | TBC1D23   | Q9NUY8                   | <b>0.018</b>                         | 0.00                               |
| Nexilin                                                                                       | NEXN      | Q0ZGT2                   | <b>0.018</b>                         | 0.00                               |
| Chromatin target of PRMT1 protein                                                             | CHTOP     | Q9Y3Y2                   | <b>0.018</b>                         | 0.00                               |
| NADH dehydrogenase [ubiquinone] flavoprotein 1, mitochondrial                                 | NDUFV1    | P49821                   | <b>0.018</b>                         | 0.00                               |
| UPF0488 protein C8orf33                                                                       | C8orf33   | Q9H7E9                   | <b>0.019</b>                         | 0.00                               |
| NCK-interacting protein with SH3 domain                                                       | NCKIPSD   | Q9NZQ3                   | <b>0.024</b>                         | 0.00                               |
| Transcriptional repressor CTCF                                                                | CTCF      | P49711                   | <b>0.029</b>                         | 0.00                               |
| NADH dehydrogenase [ubiquinone] 1 alpha subcomplex subunit 7                                  | NDUFA7    | O95182                   | <b>0.030</b>                         | 0.00                               |
| 28S ribosomal protein S2, mitochondrial                                                       | MRPS2     | Q9Y399                   | <b>0.030</b>                         | 0.00                               |
| ATP synthase subunit g, mitochondrial                                                         | ATP5L     | O75964                   | <b>0.034</b>                         | 0.00                               |

|                                                                                  |         |        |              |       |
|----------------------------------------------------------------------------------|---------|--------|--------------|-------|
| SURP and G-patch domain-containing protein 1                                     | SUGP1   | Q8IWZ8 | <b>0.035</b> | 0.00  |
| Proteasome activator complex subunit 3                                           | PSME3   | P61289 | <b>0.035</b> | 0.00  |
| Peptidyl-prolyl cis-trans isomerase G                                            | PPIG    | Q13427 | <b>0.036</b> | 0.00  |
| N-acylneuraminase cytidyltransferase                                             | CMAS    | Q8NFW8 | <b>0.039</b> | 0.00  |
| Very long-chain specific acyl-CoA dehydrogenase, mitochondrial                   | ACADVL  | P49748 | <b>0.040</b> | 0.00  |
| ATP synthase subunit d, mitochondrial                                            | ATP5H   | O75947 | <b>0.047</b> | 0.00  |
| PERQ amino acid-rich with GYF domain-containing protein 2                        | GIGYF2  | Q6Y7W6 | <b>0.028</b> | 0.020 |
| Nuclear pore complex protein Nup205                                              | NUP205  | Q92621 | <b>0.004</b> | 0.020 |
| Pre-mRNA-splicing regulator WTAP                                                 | WTAP    | Q15007 | <b>0.042</b> | 0.038 |
| Nuclear pore complex protein Nup153                                              | NUP153  | P49790 | <b>0.020</b> | 0.039 |
| Coiled-coil-helix-coiled-coil-helix domain-containing protein 3, mitochondrial   | CHCHD3  | Q9NX63 | <b>0.024</b> | 0.041 |
| Structural maintenance of chromosomes flexible hinge domain-containing protein 1 | SMCHD1  | A6NHR9 | <b>0.033</b> | 0.051 |
| SAP domain-containing ribonucleoprotein                                          | SARNP   | P82979 | <b>0.021</b> | 0.053 |
| DNA fragmentation factor subunit alpha                                           | DFFA    | O00273 | <b>0.027</b> | 0.053 |
| Hepatoma-derived growth factor-related protein 2                                 | HDGFRP2 | Q7Z4V5 | <b>0.009</b> | 0.060 |
| Pre-mRNA-splicing factor SPF27                                                   | BCAS2   | O75934 | <b>0.022</b> | 0.061 |
| Gephyrin                                                                         | GPHN    | Q9NQX3 | <b>0.002</b> | 0.064 |
| DNA replication licensing factor MCM2                                            | MCM2    | P49736 | <b>0.022</b> | 0.067 |
| E3 ubiquitin-protein ligase KCMF1                                                | KCMF1   | Q9P0J7 | <b>0.005</b> | 0.074 |
| UDP-glucose 4-epimerase                                                          | GALE    | Q14376 | <b>0.025</b> | 0.077 |
| 15-hydroxyprostaglandin dehydrogenase [NAD(+)]                                   | HPGD    | P15428 | <b>0.019</b> | 0.079 |
| Serine/arginine repetitive matrix protein 2                                      | SRRM2   | Q9UQ35 | <b>0.027</b> | 0.081 |
| Calcium/calmodulin-dependent protein kinase type II subunit delta                | CAMK2D  | Q13557 | <b>0.027</b> | 0.082 |
| Trinucleotide repeat-containing gene 6B protein                                  | TNRC6B  | Q9UPQ9 | <b>0.005</b> | 0.084 |
| Ubiquitin-conjugating enzyme E2 A                                                | UBE2A   | P49459 | <b>0.050</b> | 0.084 |
| PHD finger protein 6                                                             | PHF6    | Q8IWS0 | <b>0.036</b> | 0.086 |
| Activity-dependent neuroprotector homeobox protein                               | ADNP    | Q9H2P0 | <b>0.014</b> | 0.090 |
| Nucleoredoxin                                                                    | NXN     | Q6DKJ4 | <b>0.001</b> | 0.099 |
| HIG1 domain family member 1A, mitochondrial                                      | HIGD1A  | Q9Y241 | <b>0.018</b> | 0.099 |
| 5'-3' exoribonuclease 2                                                          | XRN2    | Q9H0D6 | <b>0.046</b> | 0.102 |
| Nuclear receptor coactivator 5                                                   | NCOA5   | Q9HCD5 | <b>0.041</b> | 0.105 |
| Mycophenolic acid acyl-glucuronide esterase, mitochondrial                       | ABHD10  | Q9NUJ1 | <b>0.038</b> | 0.105 |
| 3-ketoacyl-CoA thiolase, mitochondrial                                           | ACAA2   | P42765 | <b>0.002</b> | 0.106 |
| Isocitrate dehydrogenase [NADP], mitochondrial                                   | IDH2    | P48735 | <b>0.006</b> | 0.107 |
| Centrosomal protein of 170 kDa                                                   | CEP170  | Q5SW79 | <b>0.019</b> | 0.111 |
| MMS19 nucleotide excision repair protein homolog                                 | MMS19   | Q96T76 | <b>0.019</b> | 0.111 |
| Mitochondrial import inner membrane translocase subunit Tim8 A                   | TIMM8A  | O60220 | <b>0.003</b> | 0.114 |
| Histone deacetylase 2                                                            | HDAC2   | Q92769 | <b>0.018</b> | 0.121 |
| DBIRD complex subunit ZNF326                                                     | ZNF326  | Q5BKZ1 | <b>0.032</b> | 0.122 |
| Leucine zipper protein 1                                                         | LUZP1   | Q86V48 | <b>0.005</b> | 0.124 |

|                                                                         |        |        |              |       |
|-------------------------------------------------------------------------|--------|--------|--------------|-------|
| Laminin subunit beta-2                                                  | LAMB2  | P55268 | <b>0.041</b> | 0.125 |
| Protein PRRC2A                                                          | PRRC2A | P48634 | <b>0.004</b> | 0.128 |
| Protein max                                                             | MAX    | P61244 | <b>0.036</b> | 0.129 |
| Citrate synthase, mitochondrial                                         | CS     | O75390 | <b>0.029</b> | 0.134 |
| Telomere length regulation protein TEL2 homolog                         | TELO2  | Q9Y4R8 | <b>0.004</b> | 0.140 |
| Exportin-5                                                              | XPO5   | Q9HAV4 | <b>0.050</b> | 0.142 |
| Zinc finger protein 281                                                 | ZNF281 | Q9Y2X9 | <b>0.012</b> | 0.147 |
| PC4 and SFRS1-interacting protein                                       | PSIP1  | O75475 | <b>0.008</b> | 0.151 |
| U6 snRNA-associated Sm-like protein LSM4                                | LSM4   | Q9Y4Z0 | <b>0.038</b> | 0.154 |
| Epididymal secretory protein E1                                         | NPC2   | P61916 | <b>0.000</b> | 0.166 |
| PCI domain-containing protein 2                                         | PCID2  | Q5JVF3 | <b>0.024</b> | 0.168 |
| Calponin-3                                                              | CNN3   | Q15417 | <b>0.003</b> | 0.169 |
| Nuclear factor 1 X-type                                                 | NFIX   | Q14938 | <b>0.035</b> | 0.173 |
| Lamina-associated polypeptide 2, isoforms beta/gamma                    | TMPO   | P42167 | <b>0.034</b> | 0.175 |
| H/ACA ribonucleoprotein complex subunit 2                               | NHP2   | Q9NX24 | <b>0.033</b> | 0.176 |
| Sphingolipid delta(4)-desaturase DES1                                   | DEGS1  | O15121 | <b>0.023</b> | 0.178 |
| Cleavage and polyadenylation specificity factor subunit 5               | NUDT21 | O43809 | <b>0.003</b> | 0.179 |
| General transcription factor IIF subunit 1                              | GTF2F1 | P35269 | <b>0.044</b> | 0.183 |
| Cytochrome b-c1 complex subunit 6, mitochondrial                        | UQCRH  | P07919 | <b>0.019</b> | 0.193 |
| Dual specificity mitogen-activated protein kinase kinase 3              | MAP2K3 | P46734 | <b>0.039</b> | 0.194 |
| AN1-type zinc finger protein 1                                          | ZFAND1 | Q8TCF1 | <b>0.013</b> | 0.196 |
| Squamous cell carcinoma antigen recognized by T-cells 3                 | SART3  | Q15020 | <b>0.001</b> | 0.196 |
| Splicing factor, arginine/serine-rich 15                                | SCAF4  | O95104 | <b>0.016</b> | 0.198 |
| Hexokinase-2                                                            | HK2    | P52789 | <b>0.044</b> | 0.201 |
| Protein CYR61                                                           | CYR61  | O00622 | <b>0.029</b> | 0.201 |
| Golgin subfamily A member 4                                             | GOLGA4 | Q13439 | <b>0.050</b> | 0.209 |
| Chromobox protein homolog 8                                             | CBX8   | Q9HC52 | <b>0.019</b> | 0.211 |
| Zinc finger protein 787                                                 | ZNF787 | Q6DD87 | <b>0.014</b> | 0.212 |
| LIM domain and actin-binding protein 1                                  | LIMA1  | Q9UHB6 | <b>0.044</b> | 0.215 |
| Inosine triphosphate pyrophosphatase                                    | ITPA   | Q9BY32 | <b>0.002</b> | 0.216 |
| Macrophage migration inhibitory factor                                  | MIF    | P14174 | <b>0.003</b> | 0.216 |
| Reticulocalbin-1                                                        | RCN1   | Q15293 | <b>0.043</b> | 0.218 |
| Cell differentiation protein RCD1 homolog                               | RQCD1  | Q92600 | <b>0.047</b> | 0.219 |
| Succinate dehydrogenase [ubiquinone] iron-sulfur subunit, mitochondrial | SDHB   | P21912 | <b>0.050</b> | 0.220 |
| Malectin                                                                | MLEC   | Q14165 | <b>0.023</b> | 0.222 |
| Acylpyruvase FAHD1, mitochondrial                                       | FAHD1  | Q6P587 | <b>0.004</b> | 0.222 |
| Zinc finger CCCH domain-containing protein 15                           | ZC3H15 | Q8WU90 | <b>0.017</b> | 0.226 |
| Early endosome antigen 1                                                | EEA1   | Q15075 | <b>0.021</b> | 0.230 |
| Eukaryotic translation initiation factor 3 subunit E                    | EIF3E  | P60228 | <b>0.009</b> | 0.235 |
| Opioid growth factor receptor                                           | OGFR   | Q9NZZ2 | <b>0.019</b> | 0.235 |
| Succinyl-CoA ligase [ADP/GDP-forming] subunit alpha, mitochondrial      | SUCLG1 | P53597 | <b>0.004</b> | 0.235 |
| Transcription elongation factor SPT5                                    | SUPT5H | O00267 | <b>0.009</b> | 0.240 |

|                                                                                |          |        |              |       |
|--------------------------------------------------------------------------------|----------|--------|--------------|-------|
| Signal recognition particle 9 kDa protein                                      | SRP9     | P49458 | <b>0.020</b> | 0.246 |
| C-Myc-binding protein                                                          | MYCBP    | Q99417 | <b>0.000</b> | 0.254 |
| Transcription factor p65                                                       | RELA     | Q04206 | <b>0.045</b> | 0.258 |
| LIM domain-containing protein 1                                                | LIMD1    | Q9UGP4 | <b>0.049</b> | 0.260 |
| Double-stranded RNA-specific adenosine deaminase                               | ADAR     | P55265 | <b>0.005</b> | 0.261 |
| SUMO-activating enzyme subunit 2                                               | UBA2     | Q9UBT2 | <b>0.004</b> | 0.261 |
| Cytoplasmic dynein 1 light intermediate chain 1                                | DYNC1LI1 | Q9Y6G9 | <b>0.002</b> | 0.267 |
| 60S ribosomal export protein NMD3                                              | NMD3     | Q96D46 | <b>0.015</b> | 0.268 |
| YTH domain family protein 2                                                    | YTHDF2   | Q9Y5A9 | <b>0.014</b> | 0.269 |
| Zinc finger RNA-binding protein                                                | ZFR      | Q96KR1 | <b>0.040</b> | 0.270 |
| ADP/ATP translocase 3                                                          | SLC25A6  | P12236 | <b>0.029</b> | 0.270 |
| Replication protein A 14 kDa subunit                                           | RPA3     | P35244 | <b>0.002</b> | 0.272 |
| Glutathione S-transferase kappa 1                                              | GSTK1    | Q9Y2Q3 | <b>0.036</b> | 0.272 |
| Apolipoprotein O                                                               | APOO     | Q9BUR5 | <b>0.041</b> | 0.276 |
| Eukaryotic translation initiation factor 3 subunit M                           | EIF3M    | Q7L2H7 | <b>0.024</b> | 0.276 |
| ATP-dependent RNA helicase DDX50                                               | DDX50    | Q9BQ39 | <b>0.024</b> | 0.277 |
| FACT complex subunit SSRP1                                                     | SSRP1    | Q08945 | <b>0.009</b> | 0.278 |
| TAR DNA-binding protein 43                                                     | TARDBP   | Q13148 | <b>0.019</b> | 0.282 |
| Transmembrane protein 205                                                      | TMEM205  | Q6UW68 | <b>0.028</b> | 0.284 |
| Thyroid receptor-interacting protein 6                                         | TRIP6    | Q15654 | <b>0.003</b> | 0.285 |
| Cleavage stimulation factor subunit 2 tau variant                              | CSTF2T   | Q9H0L4 | <b>0.019</b> | 0.288 |
| Ubiquitin-protein ligase E3C                                                   | UBE3C    | Q15386 | <b>0.029</b> | 0.288 |
| PRKC apoptosis WT1 regulator protein                                           | PAWR     | Q96IZ0 | <b>0.027</b> | 0.289 |
| Thioredoxin domain-containing protein 12                                       | TXNDC12  | O95881 | <b>0.007</b> | 0.301 |
| Single-stranded DNA-binding protein, mitochondrial                             | SSBP1    | Q04837 | <b>0.032</b> | 0.307 |
| Electron transfer flavoprotein subunit alpha, mitochondrial                    | ETFA     | P13804 | <b>0.024</b> | 0.309 |
| Angio-associated migratory cell protein                                        | AAMP     | Q13685 | <b>0.026</b> | 0.311 |
| BAG family molecular chaperone regulator 2                                     | BAG2     | O95816 | <b>0.014</b> | 0.313 |
| Pantothenate kinase 4                                                          | PANK4    | Q9NVE7 | <b>0.048</b> | 0.319 |
| Nucleoprotein TPR                                                              | TPR      | P12270 | <b>0.005</b> | 0.321 |
| Serine hydroxymethyltransferase, mitochondrial                                 | SHMT2    | P34897 | <b>0.046</b> | 0.327 |
| Splicing factor 1                                                              | SF1      | Q15637 | <b>0.006</b> | 0.327 |
| Vesicle-associated membrane protein-associated protein B/C                     | VAPB     | O95292 | <b>0.035</b> | 0.327 |
| Microtubule-associated protein 1B                                              | MAP1B    | P46821 | <b>0.003</b> | 0.328 |
| Pyruvate dehydrogenase E1 component subunit alpha, somatic form, mitochondrial | PDHA1    | P08559 | <b>0.040</b> | 0.332 |
| Ribonucleases P/MRP protein subunit POP1                                       | POP1     | Q99575 | <b>0.041</b> | 0.333 |
| Protein FAM203A                                                                | HGH1     | Q9BTY7 | <b>0.031</b> | 0.333 |
| 26S proteasome non-ATPase regulatory subunit 13                                | PSMD13   | Q9UNM6 | <b>0.035</b> | 0.336 |
| Ubiquitin conjugation factor E4 A                                              | UBE4A    | Q14139 | <b>0.032</b> | 0.337 |
| ES1 protein homolog, mitochondrial                                             | C21orf33 | P30042 | <b>0.022</b> | 0.340 |
| Lysophospholipid acyltransferase 7                                             | MBOAT7   | Q96N66 | <b>0.020</b> | 0.346 |
| Serine/threonine-protein phosphatase 4 regulatory subunit 2                    | PPP4R2   | Q9NY27 | <b>0.020</b> | 0.347 |

|                                                                          |          |        |              |       |
|--------------------------------------------------------------------------|----------|--------|--------------|-------|
| Protein mago nashi homolog 2                                             | MAGOHB   | Q96A72 | <b>0.039</b> | 0.347 |
| Density-regulated protein                                                | DENR     | O43583 | <b>0.034</b> | 0.352 |
| Anterior gradient protein 2 homolog                                      | AGR2     | O95994 | <b>0.024</b> | 0.353 |
| DnaJ homolog subfamily C member 8                                        | DNAJC8   | O75937 | <b>0.041</b> | 0.356 |
| Amyloid-like protein 2                                                   | APLP2    | Q06481 | <b>0.013</b> | 0.357 |
| Tubulin-folding cofactor B                                               | TBCB     | Q99426 | <b>0.014</b> | 0.362 |
| THO complex subunit 4                                                    | ALYREF   | Q86V81 | <b>0.019</b> | 0.362 |
| Exportin-7                                                               | XPO7     | Q9UIA9 | <b>0.025</b> | 0.365 |
| Small nuclear ribonucleoprotein E                                        | SNRPE    | P62304 | <b>0.011</b> | 0.366 |
| Dynamin-like 120 kDa protein, mitochondrial                              | OPA1     | O60313 | <b>0.029</b> | 0.366 |
| Dolichyl-diphosphooligosaccharide--protein glycosyltransferase subunit 1 | RPN1     | P04843 | <b>0.005</b> | 0.368 |
| Splicing factor U2AF 35 kDa subunit                                      | U2AF1    | Q01081 | <b>0.030</b> | 0.370 |
| Histidine triad nucleotide-binding protein 1                             | HINT1    | P49773 | <b>0.032</b> | 0.370 |
| 26S proteasome non-ATPase regulatory subunit 14                          | PSMD14   | O00487 | <b>0.013</b> | 0.376 |
| Sorting nexin-1                                                          | SNX1     | Q13596 | <b>0.047</b> | 0.383 |
| Acyl-protein thioesterase 1                                              | LYPLA1   | O75608 | <b>0.024</b> | 0.385 |
| Thioredoxin-related transmembrane protein 2                              | TMX2     | Q9Y320 | <b>0.035</b> | 0.388 |
| Leucine-rich PPR motif-containing protein, mitochondrial                 | LRPPRC   | P42704 | <b>0.038</b> | 0.388 |
| Heterogeneous nuclear ribonucleoprotein A0                               | HNRNPA0  | Q13151 | <b>0.017</b> | 0.389 |
| Alpha/beta hydrolase domain-containing protein 14B                       | ABHD14B  | Q96IU4 | <b>0.038</b> | 0.391 |
| Probable ATP-dependent RNA helicase DHX36                                | DHX36    | Q9H2U1 | <b>0.036</b> | 0.395 |
| Tubulin gamma-1 chain                                                    | TUBG1    | P23258 | <b>0.005</b> | 0.397 |
| Eukaryotic translation initiation factor 2 subunit 2                     | EIF2S2   | P20042 | <b>0.014</b> | 0.398 |
| Phenylalanine--tRNA ligase beta subunit                                  | FARSB    | Q9NSD9 | <b>0.007</b> | 0.398 |
| Hydroxyacyl-coenzyme A dehydrogenase, mitochondrial                      | HADH     | Q16836 | <b>0.011</b> | 0.402 |
| Translational activator GCN1                                             | GCN1L1   | Q92616 | <b>0.050</b> | 0.403 |
| Inositol monophosphatase 1                                               | IMPA1    | P29218 | <b>0.003</b> | 0.403 |
| Hypoxia up-regulated protein 1                                           | HYOU1    | Q9Y4L1 | <b>0.044</b> | 0.405 |
| Putative RNA-binding protein Luc7-like 2                                 | LUC7L2   | Q9Y383 | <b>0.021</b> | 0.410 |
| Atlastin-3                                                               | ATL3     | Q6DD88 | <b>0.009</b> | 0.413 |
| N-alpha-acetyltransferase 15, NatA auxiliary subunit                     | NAA15    | Q9BXJ9 | <b>0.027</b> | 0.418 |
| Phosphate carrier protein, mitochondrial                                 | SLC25A3  | Q00325 | <b>0.014</b> | 0.418 |
| N-alpha-acetyltransferase 50                                             | NAA50    | Q9GZZ1 | <b>0.007</b> | 0.422 |
| BRISC and BRCA1-A complex member 1                                       | BABAM1   | Q9NWW8 | <b>0.028</b> | 0.422 |
| CUGBP Elav-like family member 1                                          | CELF1    | Q92879 | <b>0.008</b> | 0.427 |
| Uncharacterized protein C19orf43                                         | C19orf43 | Q9BQ61 | <b>0.006</b> | 0.429 |
| Protein SET                                                              | SET      | Q01105 | <b>0.011</b> | 0.429 |
| Protein canopy homolog 2                                                 | CNPY2    | Q9Y2B0 | <b>0.013</b> | 0.433 |
| Serine/arginine-rich splicing factor 3                                   | SRSF3    | P84103 | <b>0.032</b> | 0.437 |
| 60S ribosomal protein L23                                                | RPL23    | P62829 | <b>0.039</b> | 0.439 |
| PEST proteolytic signal-containing nuclear protein                       | PCNP     | Q8WW12 | <b>0.027</b> | 0.441 |
| Nucleolin                                                                | NCL      | P19338 | <b>0.040</b> | 0.441 |

|                                                                  |          |        |              |       |
|------------------------------------------------------------------|----------|--------|--------------|-------|
| Non-POU domain-containing octamer-binding protein                | NONO     | Q15233 | <b>0.019</b> | 0.442 |
| Septin-10                                                        | 10-sep   | Q9P0V9 | <b>0.012</b> | 0.444 |
| Interferon-induced, double-stranded RNA-activated protein kinase | EIF2AK2  | P19525 | <b>0.041</b> | 0.444 |
| Transcription elongation factor A protein-like 3                 | TCEAL3   | Q969E4 | <b>0.000</b> | 0.452 |
| Tumor suppressor p53-binding protein 1                           | TP53BP1  | Q12888 | <b>0.021</b> | 0.457 |
| Minor histocompatibility antigen H13                             | HM13     | Q8TCT9 | <b>0.001</b> | 0.457 |
| Signal recognition particle 54 kDa protein                       | SRP54    | P61011 | <b>0.035</b> | 0.463 |
| DAZ-associated protein 1                                         | DAZAP1   | Q96EP5 | <b>0.009</b> | 0.463 |
| DNA replication licensing factor MCM3                            | MCM3     | P25205 | <b>0.002</b> | 0.467 |
| DNA-dependent protein kinase catalytic subunit                   | PRKDC    | P78527 | <b>0.012</b> | 0.467 |
| Dihydropyrimidinase-related protein 2                            | DPYSL2   | Q16555 | <b>0.004</b> | 0.469 |
| Histone H1.3                                                     | HIST1H1D | P16402 | <b>0.010</b> | 0.474 |
| DNA replication licensing factor MCM7                            | MCM7     | P33993 | <b>0.027</b> | 0.476 |
| NADH-cytochrome b5 reductase 3                                   | CYB5R3   | P00387 | <b>0.037</b> | 0.478 |
| Heterogeneous nuclear ribonucleoprotein A/B                      | HNRNPAB  | Q99729 | <b>0.002</b> | 0.483 |
| YLP motif-containing protein 1                                   | YLPM1    | P49750 | <b>0.011</b> | 0.485 |
| Rho-related GTP-binding protein RhoB                             | RHOB     | P62745 | <b>0.030</b> | 0.485 |
| High mobility group protein B3                                   | HMGB3    | O15347 | <b>0.036</b> | 0.488 |
| Splicing factor 3B subunit 3                                     | SF3B3    | Q15393 | <b>0.026</b> | 0.493 |
| UBX domain-containing protein 1                                  | UBXN1    | Q04323 | <b>0.043</b> | 0.493 |
| Heterogeneous nuclear ribonucleoprotein A3                       | HNRNPA3  | P51991 | <b>0.031</b> | 0.498 |
| Serine--tRNA ligase, cytoplasmic                                 | SARS     | P49591 | <b>0.004</b> | 0.500 |
| tRNA (cytosine(34)-C(5))-methyltransferase                       | NSUN2    | Q08J23 | <b>0.045</b> | 0.500 |
| Secernin-1                                                       | SCRN1    | Q12765 | <b>0.035</b> | 0.505 |
| Ras GTPase-activating protein-binding protein 1                  | G3BP1    | Q13283 | <b>0.014</b> | 0.508 |
| Heterogeneous nuclear ribonucleoprotein Q                        | SYNCRIP  | O60506 | <b>0.032</b> | 0.513 |
| Nucleolar protein 56                                             | NOP56    | O00567 | <b>0.018</b> | 0.518 |
| Torsin-1A-interacting protein 2                                  | TOR1AIP2 | Q8NFAQ | <b>0.012</b> | 0.521 |
| Histone H1.4                                                     | HIST1H1E | P10412 | <b>0.039</b> | 0.524 |
| 26S proteasome non-ATPase regulatory subunit 7                   | PSMD7    | P51665 | <b>0.038</b> | 0.524 |
| Protein RCC2                                                     | RCC2     | Q9P258 | <b>0.013</b> | 0.526 |
| 60 kDa heat shock protein, mitochondrial                         | HSPD1    | P10809 | <b>0.014</b> | 0.529 |
| Heterogeneous nuclear ribonucleoprotein D0                       | HNRNPD   | Q14103 | <b>0.007</b> | 0.532 |
| X-ray repair cross-complementing protein 5                       | XRCC5    | P13010 | <b>0.044</b> | 0.535 |
| Arf-GAP domain and FG repeat-containing protein 1                | AGFG1    | P52594 | <b>0.046</b> | 0.535 |
| Apoptosis-inducing factor 1, mitochondrial                       | AIFM1    | O95831 | <b>0.000</b> | 0.535 |
| Pleiotropic regulator 1                                          | PLRG1    | O43660 | <b>0.005</b> | 0.535 |
| 3-hydroxyacyl-CoA dehydrogenase type-2                           | HSD17B10 | Q99714 | <b>0.036</b> | 0.538 |
| Sarcoplasmic/endoplasmic reticulum calcium ATPase 2              | ATP2A2   | P16615 | <b>0.034</b> | 0.541 |
| Heterogeneous nuclear ribonucleoprotein A1                       | HNRNPA1  | P09651 | <b>0.027</b> | 0.549 |
| GTP-binding protein 1                                            | GTPBP1   | O00178 | <b>0.003</b> | 0.549 |
| 40S ribosomal protein SA                                         | RPSA     | P08865 | <b>0.035</b> | 0.565 |

|                                                                      |          |        |              |       |
|----------------------------------------------------------------------|----------|--------|--------------|-------|
| Far upstream element-binding protein 2                               | KHSRP    | Q92945 | <b>0.033</b> | 0.565 |
| 60S ribosomal protein L5                                             | RPL5     | P46777 | <b>0.030</b> | 0.565 |
| Translation initiation factor eIF-2B subunit gamma                   | EIF2B3   | Q9NR50 | <b>0.032</b> | 0.568 |
| Polyadenylate-binding protein 4                                      | PABPC4   | Q13310 | <b>0.039</b> | 0.568 |
| Vimentin                                                             | VIM      | P08670 | <b>0.050</b> | 0.571 |
| Ribosomal RNA-processing protein 8                                   | RRP8     | O43159 | <b>0.019</b> | 0.575 |
| Probable ATP-dependent RNA helicase DDX17                            | DDX17    | Q92841 | <b>0.040</b> | 0.581 |
| Arginine--tRNA ligase, cytoplasmic                                   | RARS     | P54136 | <b>0.025</b> | 0.585 |
| Dihydrolipoyl dehydrogenase, mitochondrial                           | DLD      | P09622 | <b>0.039</b> | 0.588 |
| Heterogeneous nuclear ribonucleoprotein D-like                       | HNRNPDL  | O14979 | <b>0.016</b> | 0.588 |
| Ribosomal protein S6 kinase alpha-3                                  | RPS6KA3  | P51812 | <b>0.035</b> | 0.592 |
| Cytoskeleton-associated protein 5                                    | CKAP5    | Q14008 | <b>0.039</b> | 0.592 |
| Eukaryotic translation initiation factor 2 subunit 1                 | EIF2S1   | P05198 | <b>0.008</b> | 0.592 |
| 60S ribosomal protein L10a                                           | RPL10A   | P62906 | <b>0.025</b> | 0.595 |
| Phosphoribosylformylglycinamide synthase                             | PFAS     | O15067 | <b>0.026</b> | 0.595 |
| Transformer-2 protein homolog beta                                   | TRA2B    | P62995 | <b>0.026</b> | 0.599 |
| Stress-70 protein, mitochondrial                                     | HSPA9    | P38646 | <b>0.025</b> | 0.610 |
| 60S ribosomal protein L8                                             | RPL8     | P62917 | <b>0.030</b> | 0.613 |
| Poly [ADP-ribose] polymerase 1                                       | PARP1    | P09874 | <b>0.008</b> | 0.613 |
| Aspartate--tRNA ligase, cytoplasmic                                  | DARS     | P14868 | <b>0.035</b> | 0.625 |
| Testin                                                               | TES      | Q9UGI8 | <b>0.020</b> | 0.625 |
| Isoleucine--tRNA ligase, cytoplasmic                                 | IARS     | P41252 | <b>0.010</b> | 0.629 |
| V-type proton ATPase subunit B, brain isoform                        | ATP6V1B2 | P21281 | <b>0.046</b> | 0.629 |
| Mitogen-activated protein kinase 1                                   | MAPK1    | P28482 | <b>0.043</b> | 0.633 |
| E3 ubiquitin-protein ligase TRIP12                                   | TRIP12   | Q14669 | <b>0.038</b> | 0.637 |
| Low-density lipoprotein receptor                                     | LDLR     | P01130 | <b>0.035</b> | 0.641 |
| GrpE protein homolog 1, mitochondrial                                | GRPEL1   | Q9HAV7 | <b>0.037</b> | 0.641 |
| Rho-associated protein kinase 2                                      | ROCK2    | O75116 | <b>0.019</b> | 0.645 |
| 60S ribosomal protein L7a                                            | RPL7A    | P62424 | <b>0.026</b> | 0.645 |
| Hexokinase-1                                                         | HK1      | P19367 | <b>0.043</b> | 0.649 |
| Cytosol aminopeptidase                                               | LAP3     | P28838 | <b>0.050</b> | 0.649 |
| Histone H1.2                                                         | HIST1H1C | P16403 | <b>0.011</b> | 0.654 |
| tRNA (adenine(58)-N(1))-methyltransferase non-catalytic subunit TRM6 | TRMT6    | Q9UJA5 | <b>0.047</b> | 0.662 |
| 26S protease regulatory subunit 7                                    | PSMC2    | P35998 | <b>0.012</b> | 0.662 |
| Nucleosome assembly protein 1-like 4                                 | NAP1L4   | Q99733 | <b>0.044</b> | 0.662 |
| Ankyrin repeat and FYVE domain-containing protein 1                  | ANKFY1   | Q9P2R3 | <b>0.029</b> | 0.671 |
| Eukaryotic translation initiation factor 2A                          | EIF2A    | Q9BY44 | <b>0.009</b> | 0.671 |
| Heterogeneous nuclear ribonucleoproteins C1/C2                       | HNRNPC   | P07910 | <b>0.014</b> | 0.671 |
| Coatomer subunit beta'                                               | COPB2    | P35606 | <b>0.048</b> | 0.676 |
| 60S ribosomal protein L27a                                           | RPL27A   | P46776 | <b>0.019</b> | 0.685 |
| GDP-L-fucose synthase                                                | TSTA3    | Q13630 | <b>0.042</b> | 0.690 |
| Cytoskeleton-associated protein 4                                    | CKAP4    | Q07065 | <b>0.034</b> | 0.694 |

|                                                     |          |        |              |       |
|-----------------------------------------------------|----------|--------|--------------|-------|
| Acylamino-acid-releasing enzyme                     | APEH     | P13798 | <b>0.038</b> | 0.704 |
| Mannose-1-phosphate guanyltransferase beta          | GMPPB    | Q9Y5P6 | <b>0.045</b> | 0.704 |
| Spectrin beta chain, non-erythrocytic 1             | SPTBN1   | Q01082 | <b>0.012</b> | 0.709 |
| Nucleoside diphosphate kinase A                     | NME1     | P15531 | <b>0.015</b> | 0.709 |
| Cytoplasmic aconitate hydratase                     | ACO1     | P21399 | <b>0.036</b> | 0.714 |
| Exportin-2                                          | CSE1L    | P55060 | <b>0.045</b> | 0.714 |
| 78 kDa glucose-regulated protein                    | HSPA5    | P11021 | <b>0.035</b> | 0.714 |
| Lupus La protein                                    | SSB      | P05455 | <b>0.003</b> | 0.730 |
| 60S acidic ribosomal protein P2                     | RPLP2    | P05387 | <b>0.045</b> | 0.730 |
| Pigment epithelium-derived factor                   | SERPINF1 | P36955 | <b>0.034</b> | 0.735 |
| Actin-related protein 2                             | ACTR2    | P61160 | <b>0.047</b> | 0.741 |
| Vigilin                                             | HDLBP    | Q00341 | <b>0.041</b> | 0.752 |
| Actin-related protein 2/3 complex subunit 2         | ARPC2    | O15144 | <b>0.045</b> | 0.763 |
| Polyadenylate-binding protein 1                     | PABPC1   | P11940 | <b>0.034</b> | 0.763 |
| Valine--tRNA ligase                                 | VAR5     | P26640 | <b>0.014</b> | 0.775 |
| DNA dC->dU-editing enzyme APOBEC-3C                 | APOBEC3C | Q9NRW3 | <b>0.035</b> | 0.781 |
| ADP-ribosylation factor GTPase-activating protein 1 | ARFGAP1  | Q8N6T3 | <b>0.041</b> | 0.787 |
| Rho GDP-dissociation inhibitor 1                    | ARHGDI1  | P52565 | <b>0.025</b> | 0.800 |
| Thioredoxin-like protein 1                          | TXNL1    | O43396 | <b>0.047</b> | 0.806 |

**Supplementary Table 2** Significantly down-regulated proteins in exosomal fractions after apilimod treatment. Ratio api exo frac vs ctr exo frac; calculated as average TOP3TIC for exosomal fraction (exo frac) after apilimod (api) divided by average TOP3TIC for exosomal fraction after control (ctr) treatment. inf; infinite ratio (not found in control exosomal fractions).

All protein reference data are from [www.uniprot.org](http://www.uniprot.org)
